# Supplementary material for: Experiences with Family Planning amongst Persons with Mental Health Problems: A Nationwide Patient Survey
Source: MDPI journal article supplement (doi:10.3390/ijerph20043070), 2023-02-09
Supplement: s1 [file s1]

# Experiences with Family Planning amongst Persons with Mental Health Problems: A Nationwide Patient Survey

Noralie N. Schonewille <sup>1,2,3,\*</sup>, Monique J. M. van den Eijnden <sup>4</sup>, Nini H. Jonkman <sup>5</sup>,  
Anne A. M. W. van Kempen <sup>6</sup>, Maria G. van Pampus <sup>7</sup>, Francisca G. Goedhart <sup>4</sup>,  
Odile A. van den Heuvel <sup>2,8,9</sup> and Birit F. P. Broekman <sup>1,2,3</sup>

<sup>1</sup> Department of Psychiatry and Medical Psychology, OLVG, Oosterpark 9,  
1091 AC Amsterdam, The Netherlands

<sup>2</sup> Department of Psychiatry, Amsterdam UMC, Location Vrije Universiteit Amsterdam,  
Boelelaan 1117, 1081 HV Amsterdam, The Netherlands

<sup>3</sup> Amsterdam Public Health, Mental Health program, Amsterdam UMC, Location Vrije  
Universiteit Amsterdam, Boelelaan 1117, 1081 HV Amsterdam, The Netherlands

<sup>4</sup> Team Knowledge, Innovation and Research, MIND, Stationsplein 125,  
3818 LE Amersfoort, The Netherlands

<sup>5</sup> Department of Research and Epidemiology, OLVG, Oosterpark 9,  
1091 AC Amsterdam, The Netherlands

<sup>6</sup> Department of Neonatology and Pediatrics, OLVG, Oosterpark 9,  
1091 AC Amsterdam, The Netherlands

<sup>7</sup> Department of Gynecology and Obstetrics, OLVG, Oosterpark 9,  
1091 AC Amsterdam, The Netherlands

<sup>8</sup> Department of Anatomy & Neuroscience, Amsterdam UMC, Location Vrije Universiteit  
Amsterdam, Boelelaan 1117, 1081 HV Amsterdam, The Netherlands

<sup>9</sup> Amsterdam Neuroscience, Compulsivity, Impulsivity & Attention Program,  
1081 HV Amsterdam, The Netherlands

\* Correspondence: n.n.schonewille@olvg.nl; Tel.: +31-640978680

**Supplementary Table S1** Data supporting Figure 1

| Question in survey                                                               | Stratified by group | Response category | All respondents<br>N=378   |      | P-value* |
|----------------------------------------------------------------------------------|---------------------|-------------------|----------------------------|------|----------|
|                                                                                  |                     |                   | (Former) patients<br>N=354 |      |          |
|                                                                                  |                     |                   | N                          | %    |          |
| (1) I have been pregnant in my life or expected a baby (as a partner)            | Women (n=295)       | Yes               | 141                        | 47.8 | <0.001   |
|                                                                                  |                     | No                | 154                        | 52.2 |          |
|                                                                                  | Men (n=51)          | Yes               | 6                          | 11.8 |          |
|                                                                                  |                     | No                | 45                         | 88.2 |          |
| (2) I have children                                                              | Women (n=295)       | Yes               | 137                        | 46.4 | <0.001   |
|                                                                                  |                     | No                | 158                        | 53.6 |          |
|                                                                                  | Men (n=51)          | Yes               | 6                          | 11.8 |          |
|                                                                                  |                     | No                | 45                         | 88.2 |          |
| (3) I have experienced an unintended pregnancy in my life as women or as partner | Women (n=295)       | Yes               | 64                         | 21.7 | 0.105**  |
|                                                                                  |                     | No                | 221                        | 74.9 |          |
|                                                                                  | Not applicable      |                   | 4                          | 1.4  |          |
|                                                                                  | <i>Missing</i>      |                   | 6                          | 2.0  |          |
|                                                                                  | Men (n=51)          | Yes               | 4                          | 7.8  |          |
|                                                                                  |                     | No                | 41                         | 80.4 |          |
| (4) I have had an elective abortion in my life                                   | Not applicable      |                   | 1                          | 2.0  |          |
|                                                                                  | <i>Missing</i>      |                   | 5                          | 9.8  |          |
|                                                                                  | Women (n=295)       | Yes               | 16                         | 5.4  |          |
|                                                                                  |                     | No                | 279                        | 94.6 |          |

\*P-value from Chi<sup>2</sup> test comparing 'yes' category between women and men

\*\* Chi<sup>2</sup> test should be interpreted with caution as numbers in cell are less than 5

Supplementary Table S2 Data supporting Figure 2

|                                                                                                                        |                  |                               | All respondents<br>N=378      |                   |                    |    | Respondents with<br>children<br>N=151 |   |                   |     | Respondents without<br>children<br>N=227 |    |                    |         | P-value* |
|------------------------------------------------------------------------------------------------------------------------|------------------|-------------------------------|-------------------------------|-------------------|--------------------|----|---------------------------------------|---|-------------------|-----|------------------------------------------|----|--------------------|---------|----------|
|                                                                                                                        |                  |                               | (Former)<br>patients<br>N=354 |                   | Close ones<br>N=24 |    | (Former)<br>patients<br>N=147         |   | Close ones<br>N=4 |     | (Former)<br>patients<br>N=207            |    | Close ones<br>N=20 |         |          |
|                                                                                                                        |                  |                               | N                             | %                 | N                  | %  | N                                     | % | N                 | %   | N                                        | %  | N                  | %       |          |
| (1) Mental problems<br>influenced my desire to have<br>children                                                        | Yes              | 196                           | 55.4                          | 11                | 45.8               | 40 | 27.2                                  | 0 | 0.0               | 156 | 75.4                                     | 11 | 55.0               | < 0.001 |          |
|                                                                                                                        | No               | 104                           | 29.4                          | 6                 | 25.0               | 73 | 49.7                                  | 3 | 75.0              | 31  | 14.8                                     | 3  | 15.0               |         |          |
|                                                                                                                        | I am not sure    | 24                            | 6.8                           | 2                 | 8.3                | 12 | 8.2                                   | 0 | 0.0               | 12  | 5.8                                      | 2  | 10.0               |         |          |
|                                                                                                                        | Other            | 27                            | 7.6                           | 5                 | 20.8               | 21 | 14.3                                  | 1 | 25.0              | 6   | 2.9                                      | 4  | 20.0               |         |          |
|                                                                                                                        | Missing          | 3                             | 0.0                           | 0                 | 0.0                | 1  | 0.7                                   | 0 | 0.0               | 2   | 1.0                                      | 0  | 0.0                |         |          |
| (2) Mental problems<br>influenced my desire to<br>extend my family after the<br>first child (persons with<br>children) | Yes              |                               |                               |                   |                    | 46 | 31.3                                  | 1 | 25.0              |     |                                          |    |                    |         |          |
|                                                                                                                        | No               |                               |                               |                   |                    | 56 | 38.1                                  | 2 | 50.0              |     |                                          |    |                    |         |          |
|                                                                                                                        | I am not sure    |                               |                               |                   |                    | 10 | 6.8                                   | 1 | 25.0              |     |                                          |    |                    |         |          |
|                                                                                                                        | Maybe            |                               |                               |                   |                    | 14 | 9.5                                   | 0 | 0.0               |     |                                          |    |                    |         |          |
|                                                                                                                        | Not applicable   |                               |                               |                   |                    | 17 | 11.6                                  | 0 | 0.0               |     |                                          |    |                    |         |          |
|                                                                                                                        | Missing          |                               |                               |                   |                    | 4  | 2.7                                   | 0 | 0.0               |     |                                          |    |                    |         |          |
| (3) Mental problems<br>influenced my ability to<br>become pregnant                                                     | Yes              | 101                           | 28.5                          | 7                 | 29.2               | 25 | 17.0                                  | 0 | 0.0               | 76  | 36.7                                     | 7  | 35.0               | <0.001  |          |
|                                                                                                                        | No               | 183                           | 51.7                          | 6                 | 25.0               | 98 | 66.7                                  | 3 | 75.0              | 85  | 41.1                                     | 3  | 15.0               |         |          |
|                                                                                                                        | I am not sure    | 28                            | 7.9                           | 5                 | 20.8               | 8  | 5.4                                   | 1 | 25.0              | 20  | 9.7                                      | 4  | 20.0               |         |          |
|                                                                                                                        | Other            | 35                            | 9.9                           | 5                 | 20.8               | 11 | 7.5                                   | 0 | 0.0               | 24  | 11.6                                     | 5  | 25.0               |         |          |
|                                                                                                                        | Missing          | 7                             | 2.0                           | 1                 | 4.2                | 5  | 3.4                                   | 0 | 0.0               | 2   | 1.0                                      | 1  | 5.0                |         |          |
| (4) My childlessness is<br>related to my mental<br>problems                                                            | Yes              |                               |                               |                   |                    |    |                                       |   |                   | 100 | 48.3                                     | 9  | 45.0               |         |          |
|                                                                                                                        | No               |                               |                               |                   |                    |    |                                       |   |                   | 17  | 8.2                                      | 4  | 20.0               |         |          |
|                                                                                                                        | I am not sure    |                               |                               |                   |                    |    |                                       |   |                   | 20  | 9.7                                      | 0  | 0.0                |         |          |
|                                                                                                                        | Other            |                               |                               |                   |                    |    |                                       |   |                   | 31  | 15.0                                     | 0  | 0.0                |         |          |
|                                                                                                                        | Not applicable   |                               |                               |                   |                    |    |                                       |   |                   | 0   | 0.0                                      | 1  | 5.0                |         |          |
|                                                                                                                        | Missing          |                               |                               |                   |                    |    |                                       |   |                   | 39  | 18.9                                     | 6  | 30.0               |         |          |
| (5) Mental problems<br>influenced my family<br>planning                                                                | Yes              | 91                            | 25.7                          | 4                 | 16.7               | 40 | 27.2                                  | 1 | 25.0              | 51  | 24.6                                     | 3  | 15.0               | 0.673   |          |
|                                                                                                                        | No               | 129                           | 36.5                          | 4                 | 16.7               | 75 | 51.0                                  | 2 | 50.0              | 54  | 26.1                                     | 2  | 10.0               |         |          |
|                                                                                                                        | I am not sure    | 26                            | 7.3                           | 1                 | 4.2                | 13 | 8.8                                   | 0 | 0.0               | 13  | 6.3                                      | 1  | 5.0                |         |          |
|                                                                                                                        | Not applicable   | 102                           | 28.8                          | 14                | 58.3               | 15 | 10.2                                  | 1 | 25.0              | 87  | 42.0                                     | 13 | 65.0               |         |          |
|                                                                                                                        | Missing          | 6                             | 1.7                           | 1                 | 4.2                | 4  | 2.7                                   | 0 | 0.0               | 2   | 1.0                                      | 1  | 5.0                |         |          |
| (6) I had a conversation<br>about family planning when<br>desired                                                      | Yes              | 77                            | 21.8                          | 4                 | 16.7               | 20 | 13.6                                  | 0 | 0.0               | 57  | 27.5                                     | 4  | 20.0               | 0.003   |          |
|                                                                                                                        | No               | 140                           | 39.5                          | 6                 | 25.0               | 45 | 30.6                                  | 1 | 25.0              | 95  | 45.9                                     | 5  | 25.0               |         |          |
|                                                                                                                        | I am not sure    | 9                             | 2.5                           | 5                 | 20.8               | 3  | 2.0                                   | 0 | 0.0               | 6   | 2.9                                      | 5  | 25.0               |         |          |
|                                                                                                                        | Other            | 18                            | 5.1                           | 2                 | 8.3                | 6  | 4.1                                   | 0 | 0.0               | 12  | 5.8                                      | 2  | 10.0               |         |          |
|                                                                                                                        | Not applicable   | 88                            | 24.9                          | 5                 | 20.8               | 58 | 39.5                                  | 1 | 25.0              | 30  | 14.5                                     | 4  | 20.0               |         |          |
|                                                                                                                        | Missing          | 22                            | 6.2                           | 2                 | 8.3                | 15 | 10.2                                  | 2 | 50.0              | 7   | 3.4                                      | 0  | 0.0                |         |          |
| (7) I had a<br>conversation about<br>family planning<br>when desired                                                   |                  | N=107<br>(Former)<br>patients |                               | N=6<br>Close ones |                    |    |                                       |   |                   |     |                                          |    |                    |         |          |
|                                                                                                                        |                  |                               |                               |                   |                    |    |                                       |   |                   |     |                                          |    |                    |         |          |
|                                                                                                                        | Age <40<br>years |                               |                               |                   |                    |    |                                       |   |                   |     |                                          |    |                    |         |          |
|                                                                                                                        | Yes              | 41                            | 38.8                          | 1                 | 16.7               |    |                                       |   |                   |     |                                          |    |                    |         |          |
|                                                                                                                        | No               | 49                            | 45.8                          | 2                 | 33.3               |    |                                       |   |                   |     |                                          |    |                    |         |          |
|                                                                                                                        | I am not sure    | 2                             | 1.9                           | 2                 | 33.3               |    |                                       |   |                   |     |                                          |    |                    |         |          |
|                                                                                                                        | Other            | 5                             | 4.7                           | 0                 | 0.0                |    |                                       |   |                   |     |                                          |    |                    |         |          |

|                                                                             |                  |                |                               |      |                    |      |    |      |   |      |     |      |    |      |       |
|-----------------------------------------------------------------------------|------------------|----------------|-------------------------------|------|--------------------|------|----|------|---|------|-----|------|----|------|-------|
|                                                                             |                  | Not applicable | 8                             | 7.5  | 1                  | 16.7 |    |      |   |      |     |      |    |      |       |
|                                                                             |                  | Missing        | 2                             | 1.9  | 0                  | 0.0  |    |      |   |      |     |      |    |      |       |
|                                                                             |                  |                | N=222<br>(Former)<br>patients |      | N=13<br>Close ones |      |    |      |   |      |     |      |    |      |       |
|                                                                             |                  | Yes            | 30                            | 13.5 | 3                  | 23.1 |    |      |   |      |     |      |    |      |       |
|                                                                             |                  | No             | 78                            | 35.1 | 3                  | 23.1 |    |      |   |      |     |      |    |      |       |
|                                                                             | Age >40<br>years | I am not sure  | 7                             | 3.2  | 2                  | 15.4 |    |      |   |      |     |      |    |      |       |
|                                                                             |                  | Other          | 12                            | 5.4  | 1                  | 7.7  |    |      |   |      |     |      |    |      |       |
|                                                                             |                  | Not applicable | 76                            | 34.2 | 3                  | 23.1 |    |      |   |      |     |      |    |      |       |
|                                                                             |                  | Missing        | 19                            | 8.6  | 1                  | 7.7  |    |      |   |      |     |      |    |      |       |
| (8) I experienced a taboo<br>around discussing my<br>mental health problems |                  | Yes            | 221                           | 62.4 | 6                  | 25.0 | 94 | 63.9 | 2 | 50.0 | 127 | 61.4 | 4  | 20.0 | 0.700 |
|                                                                             |                  | No             | 94                            | 26.6 | 15                 | 62.5 | 41 | 27.9 | 1 | 25.0 | 53  | 25.6 | 14 | 70.0 |       |
|                                                                             |                  | I am not sure  | 23                            | 6.5  | 2                  | 8.3  | 8  | 5.4  | 1 | 25.0 | 15  | 7.2  | 1  | 5.0  |       |
|                                                                             |                  | Other          | 23                            | 3.7  | 1                  | 4.2  | 3  | 2.0  | 0 | 0.0  | 10  | 4.8  | 1  | 5.0  |       |
|                                                                             |                  | Missing        | 3                             | 0.8  | 0                  | 0.0  | 1  | 0.7  | 0 | 0.0  | 2   | 1.0  | 0  | 0.0  |       |

\*P-value from Chi<sup>2</sup> test comparing 'yes' category between (former) patients with children ('yes') and (former) patients without children

**Supplementary Table S3** Data supporting Figure 3

|                                                                                                                                           |                | All respondents<br>N=378      |   |                    |   | Respondents with<br>children<br>N=151 |      |                   |       | Respondents without<br>children<br>N=227 |   |                    |   |
|-------------------------------------------------------------------------------------------------------------------------------------------|----------------|-------------------------------|---|--------------------|---|---------------------------------------|------|-------------------|-------|------------------------------------------|---|--------------------|---|
|                                                                                                                                           |                | (Former)<br>patients<br>n=354 |   | Close ones<br>n=24 |   | (Former)<br>patients<br>N=147         |      | Close ones<br>N=4 |       | (Former)<br>patients<br>N=207            |   | Close ones<br>N=20 |   |
|                                                                                                                                           |                | N                             | % | N                  | % | N                                     | %    | N                 | %     | N                                        | % | N                  | % |
| (1) My mental health situation has<br>been related to my pregnancies or first<br>years of parenthood                                      | Yes            |                               |   |                    |   | 75                                    | 51.0 | 0                 | 0.0   |                                          |   |                    |   |
|                                                                                                                                           | No             |                               |   |                    |   | 51                                    | 34.7 | 4                 | 100   |                                          |   |                    |   |
|                                                                                                                                           | I am not sure  |                               |   |                    |   | 11                                    | 7.5  | 0                 | 0.0   |                                          |   |                    |   |
|                                                                                                                                           | Not applicable |                               |   |                    |   | 7                                     | 4.8  | 0                 | 0.0   |                                          |   |                    |   |
|                                                                                                                                           | Missing        |                               |   |                    |   | 3                                     | 2.0  | 0                 | 0.0   |                                          |   |                    |   |
| (2) My mental health has impacted the<br>live(s) of my child(ren)                                                                         | Yes            |                               |   |                    |   | 49                                    | 33.3 | 1                 | 25.0  |                                          |   |                    |   |
|                                                                                                                                           | No             |                               |   |                    |   | 37                                    | 25.2 | 1                 | 25.0  |                                          |   |                    |   |
|                                                                                                                                           | I am not sure  |                               |   |                    |   | 17                                    | 11.6 | 0                 | 0.0   |                                          |   |                    |   |
|                                                                                                                                           | Maybe          |                               |   |                    |   | 34                                    | 23.1 | 2                 | 50.0  |                                          |   |                    |   |
|                                                                                                                                           | Not applicable |                               |   |                    |   | 7                                     | 4.8  | 0                 | 0.0   |                                          |   |                    |   |
| (3) I felt supported when my mental<br>health impacted the live(s) of my<br>child(ren)*                                                   | Yes            |                               |   |                    |   | 24                                    | 49.0 | 1                 | 100.0 |                                          |   |                    |   |
|                                                                                                                                           | No             |                               |   |                    |   | 25                                    | 51.0 | 0                 | 0.0   |                                          |   |                    |   |
|                                                                                                                                           | Missing        |                               |   |                    |   | 0                                     | 0.0  | 0                 | 0.0   |                                          |   |                    |   |
|                                                                                                                                           | Yes            |                               |   |                    |   | 88                                    | 59.9 | 1                 | 25.0  |                                          |   |                    |   |
|                                                                                                                                           | No             |                               |   |                    |   | 37                                    | 25.2 | 1                 | 25.0  |                                          |   |                    |   |
| (4) There were times when, during my<br>pregnancy or after my delivery, I<br>thought my mental health problems<br>impaired me as a parent | I am not sure  |                               |   |                    |   | 11                                    | 7.5  | 1                 | 25.0  |                                          |   |                    |   |
|                                                                                                                                           | Not applicable |                               |   |                    |   | 10                                    | 6.8  | 0                 | 0.0   |                                          |   |                    |   |
|                                                                                                                                           | Missing        |                               |   |                    |   | 1                                     | 0.7  | 1                 | 25.0  |                                          |   |                    |   |
|                                                                                                                                           | Yes            |                               |   |                    |   | 69                                    | 46.9 | 3                 | 75.0  |                                          |   |                    |   |
|                                                                                                                                           | No             |                               |   |                    |   | 42                                    | 28.6 | 1                 | 25.0  |                                          |   |                    |   |
| (5) My partner supported me in my<br>parenthood                                                                                           | I am not sure  |                               |   |                    |   | 14                                    | 9.5  | 0                 | 0.0   |                                          |   |                    |   |
|                                                                                                                                           | Not applicable |                               |   |                    |   | 21                                    | 14.3 | 0                 | 0.0   |                                          |   |                    |   |
|                                                                                                                                           | Missing        |                               |   |                    |   | 1                                     | 0.7  | 0                 | 0.0   |                                          |   |                    |   |

\* Calculated amongst 49 persons who answered yes on question (2) Figure 3

**Supplementary Table S4** Data supporting Figure 4

|                                                                                                                                   |                | All respondents<br>N=378      |      |                    |      | Respondents with<br>children<br>N=151 |      |                   |      | Respondents without<br>children<br>N=227 |      |                    |      | P-value* |
|-----------------------------------------------------------------------------------------------------------------------------------|----------------|-------------------------------|------|--------------------|------|---------------------------------------|------|-------------------|------|------------------------------------------|------|--------------------|------|----------|
|                                                                                                                                   |                | (Former)<br>patients<br>n=354 |      | Close ones<br>n=24 |      | (Former)<br>patients<br>N=147         |      | Close ones<br>N=4 |      | (Former)<br>patients<br>N=207            |      | Close ones<br>N=20 |      |          |
|                                                                                                                                   |                | N                             | %    | N                  | %    | N                                     | %    | N                 | %    | N                                        | %    | N                  | %    |          |
| (1) I experienced a taboo<br>around discussing<br>sexuality                                                                       | Yes            | 206                           | 58.2 | 5                  | 20.8 | 82                                    | 55.8 | 2                 | 50.0 | 124                                      | 59.9 | 3                  | 15.0 | 0.506    |
|                                                                                                                                   | No             | 137                           | 38.7 | 19                 | 79.2 | 60                                    | 40.8 | 2                 | 50.0 | 77                                       | 37.2 | 17                 | 85.0 |          |
|                                                                                                                                   | Missing        | 11                            | 3.1  | 0                  | 0.0  | 5                                     | 3.4  | 0                 | 0.0  | 6                                        | 2.9  | 0                  | 0.0  |          |
| (2) There was a period in<br>which I had mental<br>problems, was sexually<br>active and had no<br>intention to become<br>pregnant | Yes            | 223                           | 63.0 | 12                 | 50.0 |                                       |      |                   |      |                                          |      |                    |      |          |
|                                                                                                                                   | No             | 54                            | 15.3 | 0                  | 0.0  |                                       |      |                   |      |                                          |      |                    |      |          |
|                                                                                                                                   | I am not sure  | 22                            | 6.2  | 5                  | 20.8 |                                       |      |                   |      |                                          |      |                    |      |          |
|                                                                                                                                   | Not applicable | 47                            | 13.3 | 7                  | 29.2 |                                       |      |                   |      |                                          |      |                    |      |          |
|                                                                                                                                   | Missing        | 8                             | 2.3  | 0                  | 0.0  |                                       |      |                   |      |                                          |      |                    |      |          |
| (3) I always used<br>contraceptives when (my<br>partner was) at risk or<br>pregnancy**                                            | Yes            | 168                           | 75.3 | 10                 | 83.3 |                                       |      |                   |      |                                          |      |                    |      |          |
|                                                                                                                                   | No             | 45                            | 20.2 | 1                  | 8.3  |                                       |      |                   |      |                                          |      |                    |      |          |
|                                                                                                                                   | I am not sure  | 8                             | 3.6  | 1                  | 8.3  |                                       |      |                   |      |                                          |      |                    |      |          |
|                                                                                                                                   | Missing        | 2                             | 0.9  | 0                  | 0.0  |                                       |      |                   |      |                                          |      |                    |      |          |
| (4) Mental health<br>problems have<br>influenced my sexual<br>enjoyment                                                           | Not at all     | 29                            | 8.2  | 4                  | 16.7 | 14                                    | 9.5  | 0                 | 0.0  | 15                                       | 7.2  | 4                  | 20.0 | 0.971    |
|                                                                                                                                   | A little       | 52                            | 14.7 | 1                  | 4.2  | 20                                    | 13.6 | 1                 | 25.0 | 32                                       | 15.5 | 0                  | 0.0  |          |
|                                                                                                                                   | Sometimes      | 47                            | 13.3 | 6                  | 25.0 | 19                                    | 12.9 | 0                 | 0.0  | 28                                       | 13.5 | 6                  | 30.0 |          |
|                                                                                                                                   | Often          | 92                            | 26.0 | 6                  | 25.0 | 38                                    | 25.9 | 0                 | 0.0  | 54                                       | 26.1 | 6                  | 30.0 |          |
|                                                                                                                                   | Very often     | 122                           | 34.5 | 6                  | 25.0 | 50                                    | 34.0 | 2                 | 50.0 | 72                                       | 34.8 | 4                  | 20.0 |          |
|                                                                                                                                   | Missing        | 12                            | 3.4  | 1                  | 4.2  | 6                                     | 4.1  | 1                 | 25.0 | 6                                        | 2.9  | 0                  | 0.0  |          |

\*\* Calculated amongst 235 persons who answered 'yes' in question (2) Figure 4

\*P-value from Chi<sup>2</sup> test comparing 'yes' or 'Very often' category between (former) patients with children and (former) patients without children
